# Supplementary material for: An acute microglial metabolic response controls metabolism and improves memory
Source: eLife journal article supplement (doi:10.7554/elife.87120), 2023-06-05

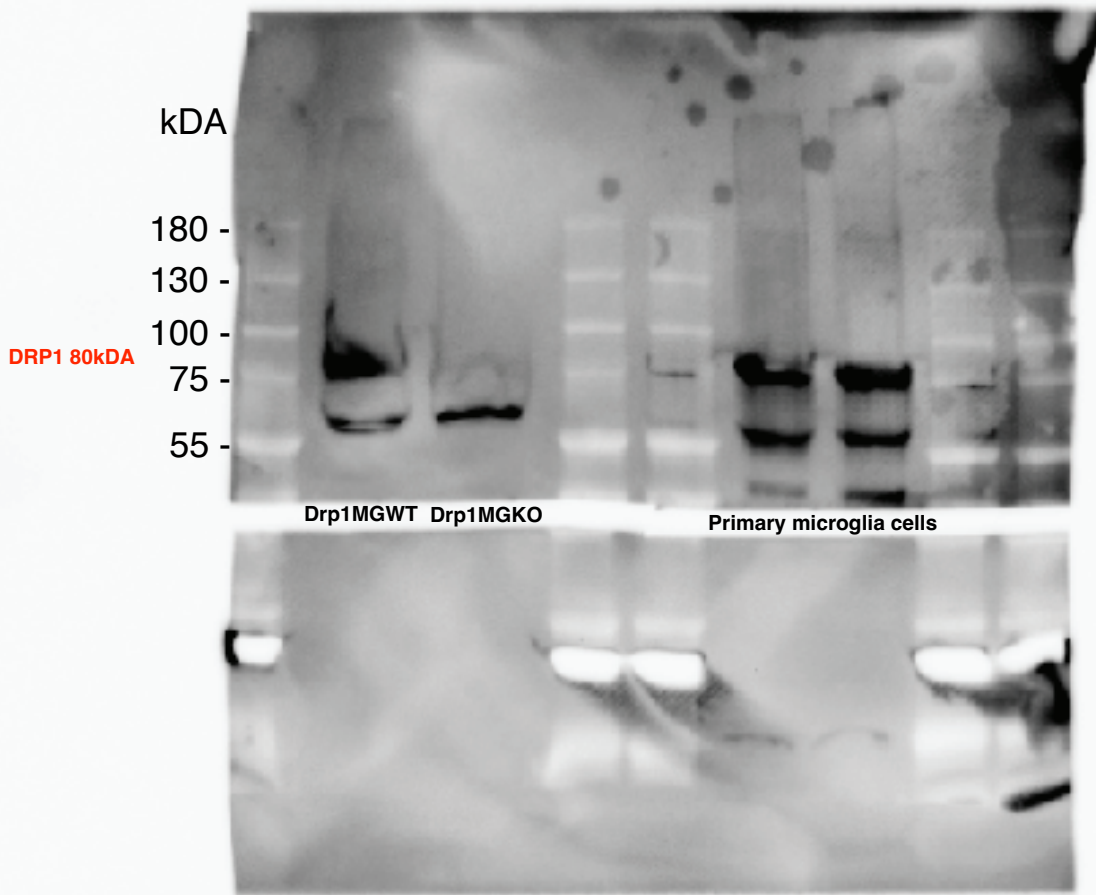

Supplement: fig3-data2 [file elife-87120-fig3-data2-v1.pdf]
